# Supplementary material
Source: publisher figshare collection journal article supplement (https://tandf.figshare.com/ndownloader/files/14331440)
Supplement: Supplementary file 1 [file 14331440]

# SUPPLEMENTAL DATA

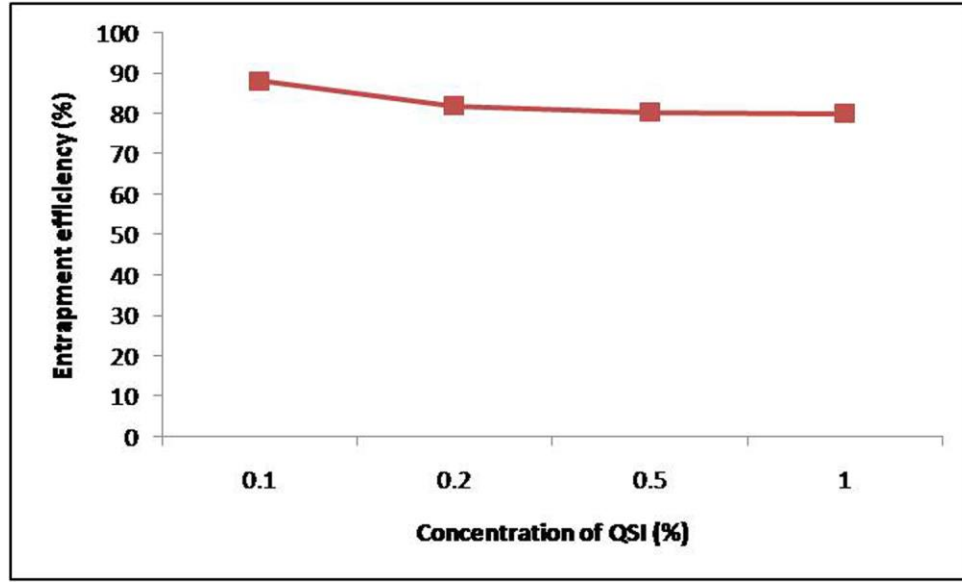

**Figure S1.** Entrapment efficiency of QSINPs with different concentration of QSI.

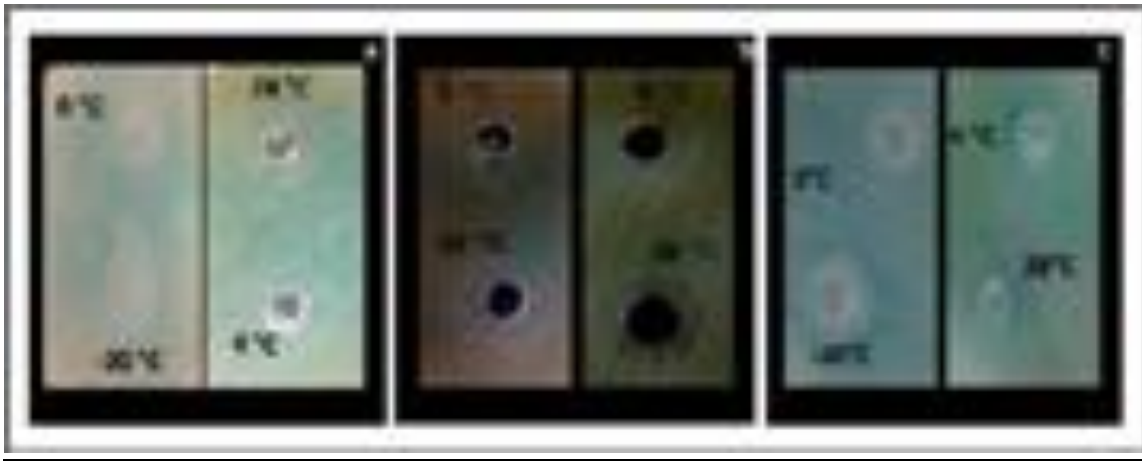

**Figure S2.** Qualitative screening images indicating QSI activity of NP formulation kept at different temperature conditions (a) after 2 months (b) after 4 months (c) after 8 months using *E. coli* MG4 reporter strain.

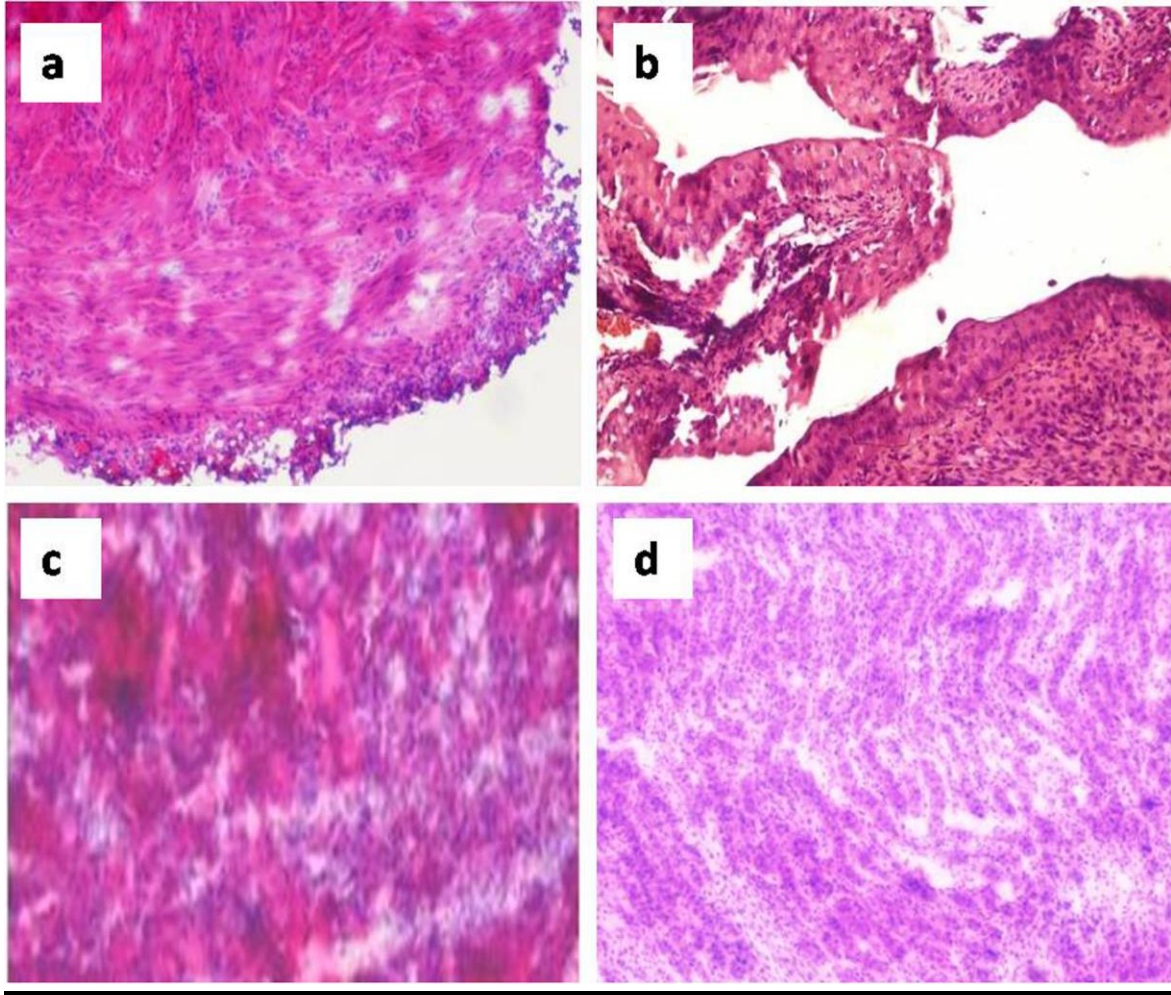

**Figure S3.** Photomicrographs (H & E) of bladder tissue of mice (a) on 5<sup>th</sup> day at 100X and (b) on 10<sup>th</sup> day at 400X (c) of renal tissue on 5<sup>th</sup> day at 100X and(d) on 10<sup>th</sup> day at 100X after administration with FITC tagged QSINPs for four days.
